# Supplementary material for: Polyaniline-wrapped 1D CoMoO4·0.75H2O nanorods as electrode materials for supercapacitor energy storage applications
Source: Royal Society of Chemistry journal article supplement (doi:10.1039/c4ra03399j), 2014-01-01
Supplement: c4ra03399j1.pdf [file c4ra03399j1.pdf]

## Supporting Information

### Polyaniline-Wrapped 1D $\text{CoMoO}_4 \cdot 0.75\text{H}_2\text{O}$ Nanorods as Electrode Materials for Supercapacitor Energy Storage Application

Manas Mandal,<sup>a</sup> Debasis Ghosh,<sup>a</sup> Soumen Giri,<sup>a</sup> Imran Shakir,<sup>b</sup> Chapal Kumar Das\*<sup>a</sup>

<sup>a</sup> Materials Science Centre, Indian Institute of Technology Kharagpur, Kharagpur, West Bengal 721302, India.

<sup>b</sup> Sustainable Energy Technologies (SET) Centre, College of Engineering, King Saud University, PO Box 800, Riyadh 11421, Kingdom of Saudi Arabia.

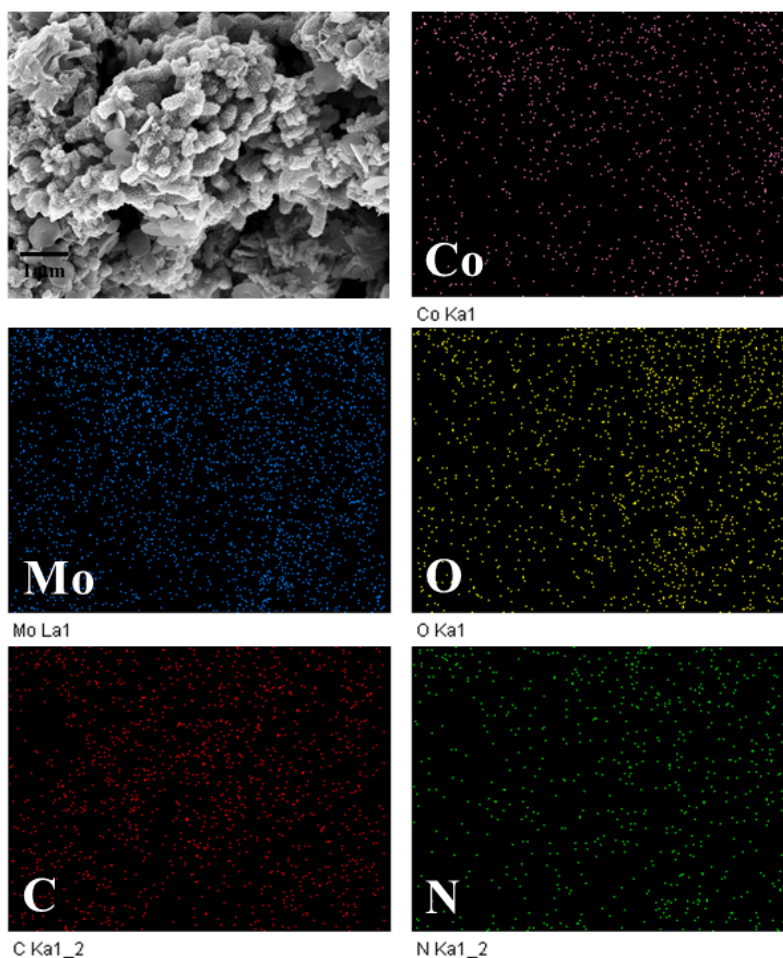

**Figure S1.** FESEM image with corresponding elemental mappings for cobalt, molybdenum, oxygen, carbon and nitrogen of  $\text{CoMoO}_4 \cdot 0.75\text{H}_2\text{O}/\text{PANI}$  composite prepared using 0.2 ml aniline monomer.

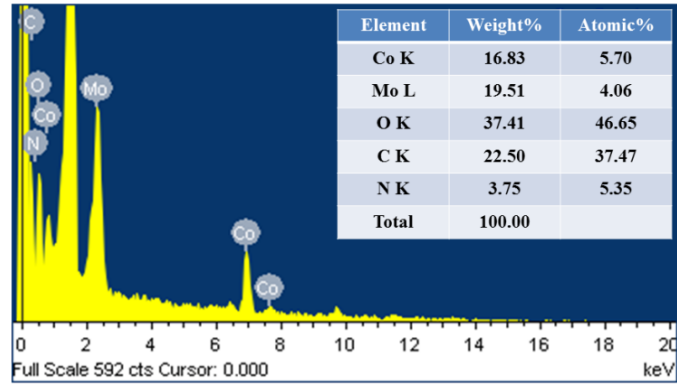

**Figure S2.** EDX of  $\text{CoMoO}_4 \cdot 0.75\text{H}_2\text{O}/\text{PANI}$  (0.2) composite.
